# Supplementary material for: Broadband microwave absorption of sandwich-like RGA/CNP/RGA composites under strong polarization relaxation at multiscale interfaces
Source: Royal Society of Chemistry journal article supplement (doi:10.1039/d5tc01482d), 2025-01-01
Supplement: d5tc01482d1.pdf [file d5tc01482d1.pdf]

## **Broadband microwave absorption of sandwich-like RGA/CNP/RGA composites depending on strong polarization relaxations of multiscale interfaces**

Mingtao Qiao<sup>1,2\*</sup>, Jingyao Bai<sup>1</sup>, Jiaoe Dang<sup>3</sup>, Xingfeng Lei<sup>2,4</sup>, Jiaxin Li<sup>1</sup>, Jingbo Qi<sup>1</sup>, Jian Wei<sup>1</sup>, Qiuyu Zhang<sup>2,4</sup>

<sup>1</sup>College of Materials Science and Engineering, Xi'an University of Architecture & Technology, Xi'an 710055, Shaanxi, PR China

<sup>2</sup>School of Chemistry and Chemical Engineering, Northwestern Polytechnical University, Xi'an 710072, PR China

<sup>3</sup>Instrumental Analysis Center, Xi'an University of Architecture and Technology, Xi'an 710055, Shaanxi, PR China

<sup>4</sup>MOE Key Laboratory of Material Physics and Chemistry under Extraordinary Condition, Ministry of Education, Northwestern Polytechnical University, Xi'an 710072, PR China

### **Characterizations**

Scanning electron microscopy (SEM, GeminiSEM500) transmission electron microscope (TEM, Talos F200X) were performed to observe the microstructure and morphology of the samples. X-ray diffraction patterns (XRD) were obtained via the Shimadzu XRD-7000s diffractometer with Cu K $\alpha$  radiation ( $\lambda = 1.542 \text{ \AA}$ ) from  $20^\circ$  to  $80^\circ$ . Raman spectroscopy of the samples was obtained by a Renishaw in Via Raman Microscope. The N<sub>2</sub> adsorption/desorption isotherms were recorded on a TriStar II 20

apparatus, and the specific surface area and pore volume analysis were performed by Brunauer-Emmett-Teller (BET) and Barrett-Joyner-Halenda (BJH) methods, respectively. The chemical binding of the samples was detected by X-ray photoelectron spectroscopy (XPS, Thermo Scientific). The magnetic properties of products were assessed using a vibrating sample magnetometer (VSM, LakeShore 7307) at room temperature. Electromagnetic parameters were measured by vector network analyses (VNA, Agilent, N5227, USA) equipped with a coaxial transmission waveguide in the frequency range 2-18 GHz.

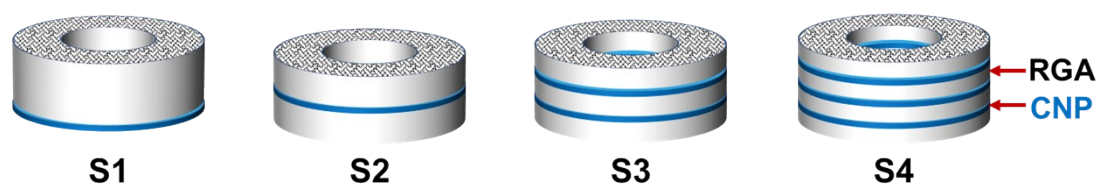

**Figure S1.** the schematic illustration of multilayered RGA/CNP composites, (S1) Janus RGA/CNP, (S2) three-layer RGA/CNP, (S3) five-layer RGA/CNP, (S4) seven-layer RGA/CNP composites.

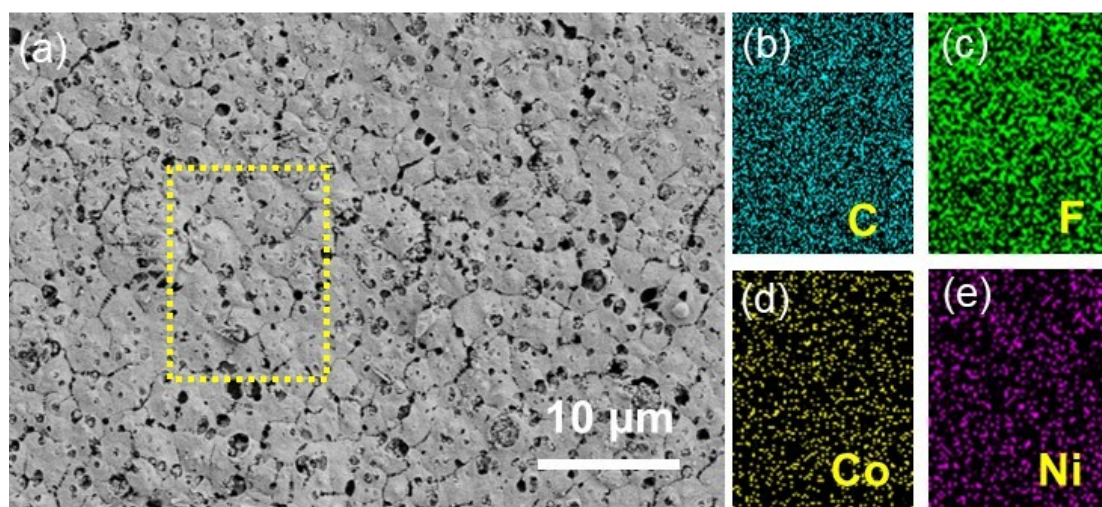

**Figure S2.** (a) SEM image and (b-e) EDS images of CNP films

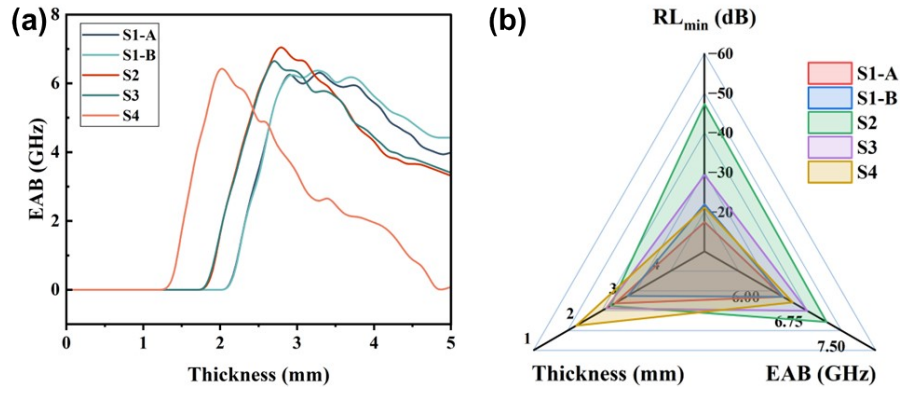

**Figure S3.** (a) The trend curves of EAB with increasing the layer thickness, and (b) the corresponding radar map.

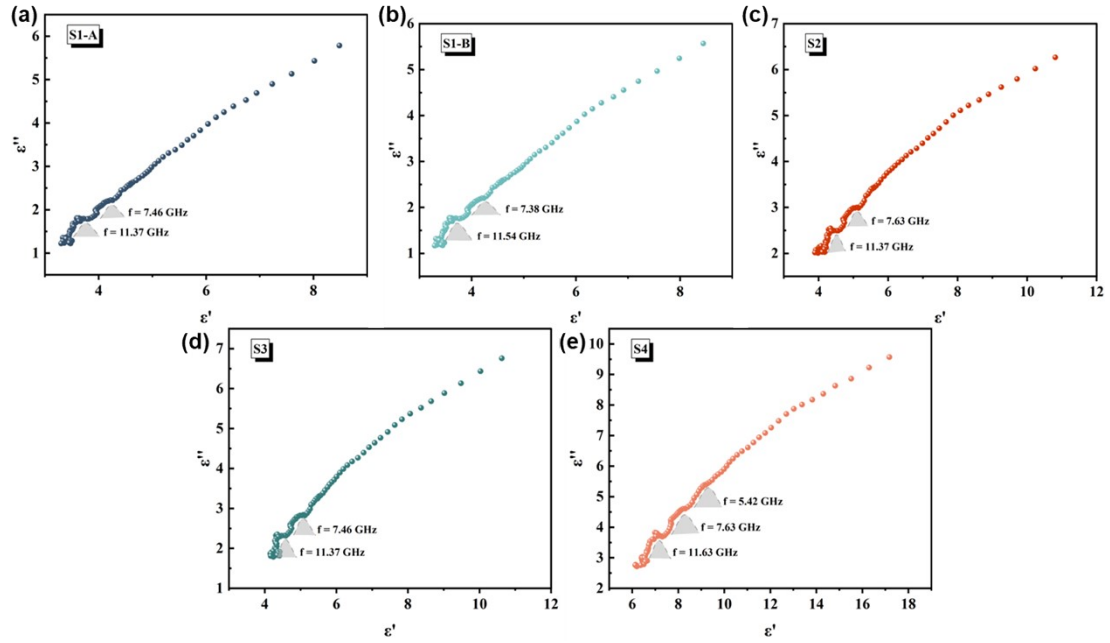

**Figure S4.** The Cole-Cole curves of samples

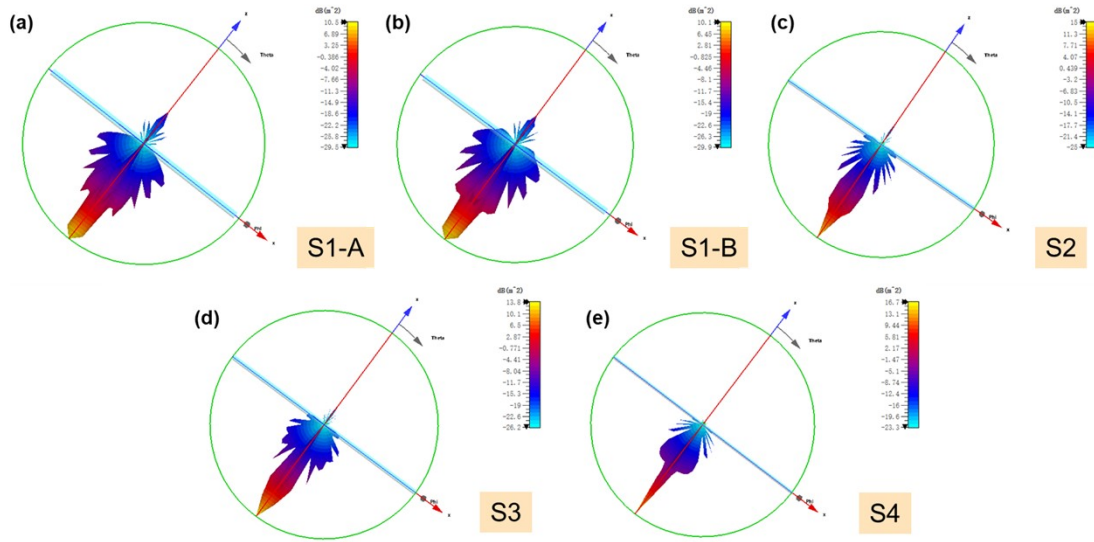

**Figure S5.** 3D CST far-field simulation results for samples

**Table S1.** The comparison among similar microwave absorbers

| Samples                                     | RL <sub>min</sub> (dB)/<br>Thickness(mm) | EAB <sub>max</sub> (GHz)/<br>Thickness(mm) | Refs   |
|---------------------------------------------|------------------------------------------|--------------------------------------------|--------|
| Co/C                                        | -38.8/1.82                               | 4.7/1.5                                    | [1]    |
| Ni/C                                        | -26.3/2.3                                | 5.2/1.8                                    | [2]    |
| CoNi@C                                      | -47.1/2.0                                | 5.1/1.7                                    | [3]    |
| CoNi@C@rGO                                  | -48/4.5                                  | 6.24/1.6                                   | [4]    |
| Co <sub>2</sub> Ni <sub>1</sub> /C-800/PVDF | -52/3.0                                  | 4.5/3.0                                    | [5]    |
| Ni@C-rGO                                    | -53.64/4.1                               | 6.64/2.55                                  | [6]    |
| CoNi-C aerogels                             | -40.69/2.41                              | 5.7 /1.76                                  | [7]    |
| Co@RGA microspheres                         | -70.4/2.2                                | 5.65/1.98                                  | [8]    |
| 2D CoNi/C                                   | -60.1/1.65                               | 6.24/1.0                                   | [9]    |
| CoNi@carbon/RGO                             | -41.09/1.5                               | 5.41/1.5                                   | [10]   |
| Ni-MOF-rGO aerogel                          | -51.19/1.9                               | 6.32/1.9                                   | [11]   |
| CoNi/carbon foam                            | -47.35/2.4                               | 5.6/2.4                                    | [12]   |
| MXene-CNTs/Co                               | -41.29/1.38                              | 4.2/1.38                                   | [13]   |
| CoNi/C                                      | -61.02/2.0                               | 5.2/2.0                                    | [14]   |
| RGA/CNP/RGA                                 | -48.03/2.7                               | 7.14/2.8                                   | Herein |

**Table S2. The order of samples in the microwave absorption properties**

| Microwave absorption properties             | The order of samples                    |
|---------------------------------------------|-----------------------------------------|
| Effective absorption bandwidth              | S2>S3>S4                                |
| Impedance matching ( $ Z_{in}/Z_0 $ )       | S2≈S3>S4                                |
| Conductive loss                             | S4>S3>S2>S1                             |
| Polarization loss                           | S4>S2>S3>S1                             |
| Dielectric loss tangent ( $\tan \delta_e$ ) | S4>S2≈S3>S1 ( $\tan \delta_e > 0.4$ )   |
| Magnetic loss tangent ( $\tan \delta_\mu$ ) | S4>S2≈S3≈S1 ( $\tan \delta_\mu < 0.4$ ) |
| Attenuation coefficient ( $\alpha$ )        | S4>S2>S3>S1                             |

**The related theory equations:**

(1) According to the transmission line theory in the metallic backing condition, the calculation formula of the RL- $f$  curves are as follows [15,16]:

$$RL = 20 \lg_{10} |(Z_{in} - Z_0) / (Z_{in} + Z_0)| \quad (1)$$

$$Z_{in} = Z_0 \sqrt{\frac{\mu_r}{\epsilon_r}} \tanh \left( j \frac{2\pi f d \sqrt{\mu_r \epsilon_r}}{c} \right) \quad (2)$$

Where  $Z_0$  is the characteristic impedance of free space,  $Z_{in}$  is the normalized input impedance of absorber,  $\epsilon_r$  and  $\mu_r$  are the relative complex permittivity and permeability,  $d$  is the layer thickness,  $c$  is the speed of light in free space and  $f$  is the frequency.

(2) According to the Debye theory, Cole–Cole semicircle model can be expressed by the following equations [15, 17]:

$$\epsilon' = \frac{\epsilon_s - \epsilon_\infty}{1 + \omega^2 \tau^2} + \epsilon_\infty \quad (3)$$

$$\epsilon'' = \epsilon_p'' + \epsilon_c'' = \omega \tau \frac{\epsilon_s - \epsilon_\infty}{1 + \omega^2 \tau^2} + \frac{\sigma}{\epsilon_0 \omega} \quad (4)$$

$$\left( \epsilon' - \frac{\epsilon_s + \epsilon_\infty}{2} \right)^2 + (\epsilon'')^2 = \left( \frac{\epsilon_s - \epsilon_\infty}{2} \right)^2 \quad (5)$$

where  $\tau$  represents relaxation time,  $\epsilon_s$  and  $\epsilon_\infty$  represent static permittivity and optical

permittivity respectively.

(3) The eddy current loss  $C_0$  of magnetic loss materials is expressed by the following equation [16, 18]:

$$C_0 = \mu''(\mu')^{-2} f^{-1} = 2\pi\mu_0\sigma d^2/3 \quad (6)$$

(4) The attenuation ability of the materials can be assessed by attenuation coefficient ( $\alpha$ ) as followed [15, 19]:

$$\alpha = \frac{\sqrt{2}\pi f}{c} \times \sqrt{(\mu''\varepsilon'' - \mu'\varepsilon') + \sqrt{(\mu''\varepsilon'' - \mu'\varepsilon')^2 + (\mu'\varepsilon'' + \mu''\varepsilon')^2}} \quad (7)$$

(5) The percentage of dielectric loss and magnetic loss can be expressed by the following equations:

$$W_c = \frac{\varepsilon_c''}{\varepsilon'' + \mu''} \quad (8)$$

$$W_p = \frac{\varepsilon_p''}{\varepsilon'' + \mu''} \quad (9)$$

$$W_m = \frac{\mu''}{\varepsilon'' + \mu''} \quad (10)$$

where  $W_c$ ,  $W_p$ ,  $W_m$  represents the percentage of conductive loss, polarization loss and magnetic loss in the attenuation process respectively.

(6) The RCS values can be calculated as follows [20, 21]:

$$\sigma(dBm^2) = 10\log \left[ \frac{4\pi S}{\lambda^2} \left| \frac{E_s}{E_i} \right|^2 \right] \quad (11)$$

Where  $E_i$  and  $E_s$  represent the electric field strength of the incident and scattered waves, respectively,  $S$  is area of the simulated plate and  $\lambda$  is the wavelength.

## References

- [1] Xie P, Liu Y, Feng M, et al. Hierarchically porous Co/C nanocomposites for ultralight high-performance microwave absorption. *Advanced Composites and Hybrid Materials*, 2021, 4: 173-185.
- [2] Zhang Y, Zhang X, Quan B, et al. A facile self-template strategy for synthesizing 1D porous Ni@C nanorods towards efficient microwave absorption. *Nanotechnology*, 2017, 28(11): 115704.
- [3] Shen Z, Yang H, Xiong Z, et al. Hollow core-shell CoNi@C and CoNi@NC composites as high-performance microwave absorbers. *Journal of Alloys and Compounds*, 2021, 871: 159574.
- [4] Peng K, Wu Y, Fang G, et al. Self-assembly hollow magnetoelectric composites emerging tunable property between microwave absorption and shielding with light-weight and broad bandwidth. *Journal of Alloys and Compounds*, 2023, 947: 169368.
- [5] Wang Y L, Wang G S, Zhang X J, et al. Porous carbon polyhedrons coupled with bimetallic CoNi alloys for frequency selective wave absorption at ultralow filler loading. *Journal of Materials Science & Technology*, 2022, 103: 34-41.
- [6] Qiu J, Liu X, Peng C, et al. Porous metal microsphere M@C-rGO (metal= Mn, Fe, Co, Ni, Cu) aerogels with high low-frequency microwave absorption, strong thermal insulation and superior anticorrosion performance. *Journal of Materials Chemistry A*, 2024, 12(33): 21997-22012.
- [7] Xu Q, Zhu X, Yu J, et al. Constructing core-shell structural bimetallic CoNi alloys doped carbon aerogels for highly efficient electromagnetic wave absorption. *Journal of Alloys and Compounds*, 2025: 178854.
- [8] Xu Q, Zhu X, Yu J, et al. Constructing core-shell structural bimetallic CoNi alloys doped carbon aerogels for highly efficient electromagnetic wave absorption. *Journal of Alloys and Compounds*, 2025: 178854.
- [9] Huang W, Song M, Wang S, et al. Dual-step Redox Engineering of Two-Dimensional CoNi-Alloy Embedded B, N-Doped Carbon Layers towards Tunable Electromagnetic Wave Absorption and Light-Weight Infrared Stealth Heat Insulation Devices. *Advanced Materials*, 2024: 2403322.
- [10] Ma C, Zhang C, Yuan M, et al. ZIF-67 derived CoNi@carbon/RGO composites with abundant heterogeneous interfaces for electromagnetic wave absorption. *Applied Surface Science*, 2024, 665: 160283.
- [11] Cao K, Yang X, Zhao R, et al. Fabrication of an ultralight Ni-MOF-rGO aerogel with both dielectric and magnetic performances for enhanced microwave absorption: microspheres with hollow structure grow onto the GO nanosheets. *ACS Applied Materials & Interfaces*, 2023, 15(7): 9685-9696.
- [12] Guo X, Nie Z, Feng Y, et al. In situ growth of CoNi alloy/N-doped hollow carbon foam for electromagnetic wave absorption. *ACS Applied Nano Materials*, 2024, 7(16): 19427-19438.
- [13] Yongqi Zhao, Jingjing Wang, Danyi Yang, et al. MXene-CNTs/Co dielectric-electromagnetic synergistic composites with multi-heterogeneous interfaces for microwave absorption [J]. *Carbon*, 2025, 232: 119825.
- [14] Kai Lin, Lingyun Wu, Tianyu Wu, et al. Bimetal-doped core-shell carbon derived from

nickel-cobalt dual-ligand metal-organic framework for adjustable strong microwave absorption [J]. *Journal of Colloid and Interface Science*, 2022, 627: 90-101.

- [15] Song L, Wu C, Zhi Q, et al. Multifunctional SiC aerogel reinforced with nanofibers and nanowires for high-efficiency electromagnetic wave absorption. *Chemical Engineering Journal*, 2023, 467: 143518.
- [16] Li K, Han L, Wang T, et al. 4D printing MOF-derived/multi-fluorination nanocomposites for ultra-efficient electromagnetic wave absorption and robust environment adaptivity. *Journal of Materials Chemistry A*, 2024, 12(11): 6302-6317.
- [17] He Z, Xu H, Shi L, et al. Hierarchical Co<sub>2</sub>P/CoS<sub>2</sub>@C@MoS<sub>2</sub> composites with hollow cavity and multiple phases toward wideband electromagnetic wave absorption. *Small*, 2024, 20(6): 2306253.
- [18] Chen Y, He W, Zhou H, et al. Compressible and conductive multi-scale composite aerogel elastomers for electromagnetic wave absorption, energy harvesting, and piezoresistive sensing. *Nano Energy*, 2024, 119: 109100.
- [19] Feng S, Wang H, Ma J, et al. Fabrication of hollow Ni/NiO/C/MnO<sub>2</sub>@ polypyrrole core-shell structures for high-performance electromagnetic wave absorption. *Composites Part B: Engineering*, 2024, 275: 111344.
- [20] Huang M, Wang L, Pei K, et al. Heterogeneous Interface Engineering of Bi-Metal MOFs-derived ZnFe<sub>2</sub>O<sub>4</sub>-ZnO-Fe@C Microspheres via Confined Growth Strategy Toward Superior Electromagnetic Wave Absorption. *Advanced Functional Materials*, 2024, 34(3): 2308898.
- [21] Rao L, Wang L, Yang C, et al. Confined diffusion strategy for customizing magnetic coupling spaces to enhance low-frequency electromagnetic wave absorption. *Advanced Functional Materials*, 2023, 33(16): 2213258.
